# Supplementary material
Source: PubMed Central journal article supplement (PMC6298967)
Supplement: 41396_2018_256_MOESM1_ESM.pdf [file 41396_2018_256_MOESM1_ESM.pdf]

**SUPPLEMENTARY INFORMATION**

**SUPPLEMENTARY TABLES**

**Table S1:** Plant species and number of individual trees included in fruit biomass calculations. Of all plants recorded during transect sampling, only species included in our monthly phenology surveys and individual plants with a DBH (diameter at breast height) greater than the species-specific threshold were used in biomass calculations of fruit abundance. Plants below a certain size do not produce ripe fruit or support the weight of a monkey. We calculate the threshold as the minimum DBH for that plant species that we have observed capuchins to forage in (Melin *et al.*, 2014a).

| <b>Species</b>                 | <b>Threshold DBH (cm)</b> | <b># Foraging Records Used to Calculate Threshold DBH</b> | <b># Trees in Transects</b> | <b># Trees Used for Biomass Calculation</b> |
|--------------------------------|---------------------------|-----------------------------------------------------------|-----------------------------|---------------------------------------------|
| <i>Alibertia edulis</i>        | 0.95                      | 74                                                        | 1639                        | 1219                                        |
| <i>Allophylus occidentalis</i> | 5.41                      | 62                                                        | 476                         | 123                                         |
| <i>Annona reticulata</i>       | 7.96                      | 96                                                        | 112                         | 60                                          |
| <i>Bromelia pinguin</i>        |                           | 168                                                       | 739                         | 739                                         |
| <i>Bromelia plumieri</i>       |                           | 986                                                       | 476                         | 476                                         |
| <i>Bursera simaruba</i>        | 10.19                     | 481                                                       | 633                         | 290                                         |
| <i>Byrsonima crassifolia</i>   | 6.37                      | 333                                                       | 432                         | 282                                         |
| <i>Cassia grandis</i>          | 10.00                     | 1                                                         | 1                           | 1                                           |
| <i>Castilla elastica</i>       | 14.97                     | 39                                                        | 51                          | 4                                           |
| <i>Cecropia peltata</i>        | 12.41                     | 134                                                       | 26                          | 18                                          |

|                                     |       |      |      |     |
|-------------------------------------|-------|------|------|-----|
| <i>Cordia guanacastensis</i>        | 1.13  | 98   | 1248 | 965 |
| <i>Cordia panamensis</i>            | 6.68  | 53   | 349  | 159 |
| <i>Curatella americana</i>          | 8.12  | 37   | 108  | 43  |
| <i>Diospyros salicifolia</i>        | 3.18  | 43   | 344  | 205 |
| <i>Diphysa americana</i>            | 20.94 | 13   | 25   | 5   |
| <i>Dipterodendron costaricensis</i> | 15.60 | 95   | 59   | 15  |
| <i>Eugenia salamensis</i>           | 8.28  | 160  | 187  | 85  |
| <i>Ficus cotinifolia</i>            | 29.73 | 126  | 2    | 2   |
| <i>Ficus hondurensis</i>            | 18.52 | 57   | 12   | 5   |
| <i>Ficus morazaniana</i>            | 32.47 | 26   | 2    | 1   |
| <i>Ficus ovalis</i>                 | 26.42 | 95   | 4    | 2   |
| <i>Genipa americana</i>             | 5.41  | 1041 | 351  | 183 |
| <i>Guettarda macrosperma</i>        | 8.59  | 97   | 269  | 155 |
| <i>Jacquinia nervosa</i>            | 2.99  | 59   | 126  | 64  |
| <i>Karwinskia calderonii</i>        | 16.89 | 191  | 71   | 25  |
| <i>Licania arborea</i>              | 46.52 | 1    | 64   | 6   |
| <i>Maclura tinctoria</i>            | 11.11 | 705  | 8    | 6   |

|                               |       |     |      |     |
|-------------------------------|-------|-----|------|-----|
| <i>Malvaviscus arboreus</i>   | 1.91  | 101 | 1021 | 488 |
| <i>Manilkara chicle</i>       | 12.41 | 423 | 393  | 76  |
| <i>Miconia argentea</i>       | 2.23  | 108 | 7    | 5   |
| <i>Muntingia calabura</i>     | 9.55  | 22  | 4    | 1   |
| <i>Ficus goldmani</i>         | 13.37 | 3   | 0    | 0   |
| <i>Ficus obtusifolia</i>      | 15.92 | 28  | 0    | 0   |
| <i>Psidium guajava</i>        | 3.71  | 50  | 27   | 14  |
| <i>Randia monantha</i>        | 3.18  | 427 | 725  | 317 |
| <i>Randia thurberi</i>        | 2.23  | 43  | 249  | 131 |
| <i>Sapium glandulosum</i>     | 22.92 | 66  | 49   | 2   |
| <i>Sciadodendron excelsum</i> | 43.61 | 132 | 9    | 1   |
| <i>Simarouba glauca</i>       | 8.91  | 179 | 239  | 57  |
| <i>Sloanea terniflora</i>     | 19.41 | 129 | 40   | 7   |
| <i>Spondias mombin</i>        | 9.57  | 357 | 241  | 163 |
| <i>Spondias purpurea</i>      | 5.41  | 16  | 37   | 21  |
| <i>Stemmadenia obovata</i>    | 3.19  | 300 | 848  | 412 |
| <i>Tabebuia ochracea</i>      | 15.92 | 25  | 1025 | 80  |

|                            |       |     |      |      |
|----------------------------|-------|-----|------|------|
| <i>Trichilia americana</i> | 35.97 | 5   | 47   | 1    |
| <i>Trichilia martiana</i>  | 11.78 | 28  | 35   | 8    |
| <i>Vachellia collinsii</i> | 0.95  | 83  | 4715 | 2845 |
| <i>Zuelania guidonia</i>   | 4.51  | 209 | 190  | 109  |

15  
16  
17  
18  
19  
20  
21  
22

**Table S2:** Ethogram used during behavioral data collection, together with frequency of behaviors recorded. One behavioral state depicting the behavior of the majority of group members was recorded on the hour and half-hour while following wild white-faced capuchin monkeys. 912 scans were recorded over the study period.

| <b>Code</b> | <b>Name of State Behavior</b> | <b>Description</b>                                                                                             | <b>Number Records</b> | <b>% Group Scans</b> |
|-------------|-------------------------------|----------------------------------------------------------------------------------------------------------------|-----------------------|----------------------|
| GFFL        | Foraging flowers              | Group is in a food patch where flowers are being consumed                                                      | 3                     | 0.33                 |
| GFFR        | Foraging fruit                | Group is in a food patch where ripe fruit are being consumed                                                   | 139                   | 15.24                |
| GFIN        | Foraging insects              | Group is in a food patch where clumped insects (caterpillars, eggs, embedded invertebrates) are being consumed | 7                     | 0.77                 |
| GFOT        | Foraging other                | Group is in a food patch where other foods (seeds, pith, vertebrates, bromeliad leaves) are being consumed     | 6                     | 0.66                 |
| GOTH        | Other                         | Other behaviors, including intergroup interactions, predator mobbing                                           | 2                     | 0.22                 |
| GRES        | Resting                       | Inactive and not in contact with other monkeys                                                                 | 91                    | 9.98                 |
| GSAC        | Social active                 | Grooming or play behavior                                                                                      | 3                     | 0.33                 |

|      |                   |                                                                                         |     |       |
|------|-------------------|-----------------------------------------------------------------------------------------|-----|-------|
| GSAG | Social agonistic  | Agonistic behaviors, including biting, chasing, threat displays, submissive gestures    | 1   | 0.11  |
| GSRE | Social resting    | Inactive and resting in contact with other monkeys                                      | 106 | 11.62 |
| GSSS | Self-directed     | Self-directed behaviors, grooming                                                       | 12  | 1.32  |
| GTRA | Traveling         | Relatively fast-paced and direct group movement, without visual foraging                | 18  | 1.97  |
| GVFO | Visually foraging | Gleaning insects from surfaces of leaves, bark, ground, branches typically while moving | 517 | 56.69 |
| GVIG | Vigilant          | Alert scanning of environment beyond arm's reach                                        | 7   | 0.77  |

23

24 **Table S3:** Sampling details for fecal samples collected from white-faced capuchin monkeys in  
 25 Sector Santa Rosa, Costa Rica. All sampling bouts occurred within 2014.

26

| <b>Sampling Bout</b> |                  |                   |                  |
|----------------------|------------------|-------------------|------------------|
| <b>SB 1</b>          | <b>SB 2</b>      | <b>SB 3</b>       | <b>SB 4</b>      |
| <b>Late Dry</b>      | <b>Early Wet</b> | <b>Middle Wet</b> | <b>Early Dry</b> |
| April 29 - 30        | June 3           | July 29           | November 25 -26  |
| May 1 - 5            | June 13 -14      | September 3       | December 3 - 4   |
| May 6 - 7            | June 24 -25      | Aug 17 -18        | December 9 - 10  |

27

28

29

30

31

32

33

34

35

36

37

38

39

40

41 **Table S4:** Carbohydrate binding module categories from [www.cazypedia.org](http://www.cazypedia.org)  
42

**Alpha-Glucans**

CBM20, CBM21, CBM24, CBM25, CBM26, CBM34, CBM41, CBM45, CBM48, CBM53, CBM58

**Cellulose**

CBM1, CBM2, CBM3, CBM4, CBM6, CBM10, CBM16, CBM30, CBM37, CBM44, CBM46,  
CBM49, CBM63, CBM64

**Chitin**

CBM1, CBM2, CBM3, CBM5, CBM12, CBM14, CBM18, CBM19, CBM37, CBM50, CBM55,

**Fructans**

CBM38

**Mammalian Glycans**

CBM32, CBM47, CBM51, CBM57

**Plant Cell Wall - Other**

CBM4, CBM6, CBM13, CBM16, CBM22, CBM32, CBM35, CBM39, CBM42, CBM43, CBM52,  
CBM61, CBM62

**Xylan**

CBM2, CBM4, CBM6, CBM13, CBM22, CBM31, CBM35, CBM36, CBM37, CBM44, CBM54,  
CBM60

**Bacterial Cell Wall Sugars**

CBM35, CBM39, CBM50

43  
44  
45  
46  
47  
48  
49  
50  
51  
52  
53  
54  
55  
56  
57  
58  
59  
60  
61  
62  
63  
64  
65

66 **Table S5:** Total Representation of Bacterial Phyla  
 67

| <b>Phylum</b>              | <b>Taxa</b> |
|----------------------------|-------------|
| Firmicutes                 | 884         |
| Proteobacteria             | 823         |
| Actinobacteria             | 583         |
| Bacteroidetes              | 327         |
| Acidobacteria              | 171         |
| Planctomycetes             | 130         |
| Chloroflexi                | 69          |
| Verrucomicrobia            | 52          |
| Armatimonadetes            | 21          |
| Candidate Division<br>WPS2 | 17          |
| Fusobacteria               | 17          |
| Thaumarchaeota             | 15          |
| Gemmatimonadetes           | 11          |
| Euryarchaeota              | 10          |
| Deinococcus-Thermus        | 4           |
| Candidate Division<br>WPS1 | 3           |
| Chlamydiae                 | 3           |
| Nitrospirae                | 3           |
| Synergistetes              | 3           |
| Tenericutes                | 3           |
| Aminicenantes              | 1           |
| BRC1                       | 1           |
| Deferribacteres            | 1           |
| Hydrogenedentes            | 1           |
| SR1                        | 1           |

68  
 69  
 70  
 71  
 72  
 73  
 74  
 75  
 76  
 77  
 78  
 79  
 80  
 81  
 82  
 83  
 84  
 85  
 86  
 87

88 **Table S6:** Significant differences in 10 most abundant genera between season and sampling  
 89 bouts Tukey's HSD adjusted p-value: \*\*\* < 0.001; \*\* p < 0.01; p < 0.05\*  
 90

| Genus                       | Pattern  | Anova               | Tukey's HSD                    |
|-----------------------------|----------|---------------------|--------------------------------|
| <i>Streptococcus</i>        | Rainfall | p < 0.001; F = 21.8 | 1>2***, 1>3***, 4>2***, 4>3*** |
| <i>Bifidobacterium</i>      | Fruit    | p < 0.001; F = 8.3  | 1>2***, 1>3**, 1>4*            |
| <i>Rothia</i>               |          | NS                  | NS                             |
| <i>Olsenella</i>            | Fruit    | p < 0.01; F = 5.1   | 1<4** 2<4**                    |
| <i>Clostridium XIVa</i>     | Fruit    | p < 0.001; F = 32.0 | 1<4***, 2<4***, 3<4***         |
| <i>Megamonas</i>            | Fruit    | p < 0.001; F = 9.9  | 1<3*, 1<4***, 2<4**            |
| <i>Escherichia/Shigella</i> | Rainfall | NS                  | NS                             |
| <i>Lactobacillus</i>        |          | NS                  | NS                             |
| <i>Lactococcus</i>          | Fruit    | p < 0.01; F = 6.0   | 1>2**, 1>3**, 1>4**            |
| <i>Weisella</i>             | Fruit    | NS                  | NS                             |
|                             |          |                     |                                |
| Alpha Diversity             | Pattern  | Anova               | Tukey's HSD                    |
| Observed                    | Rainfall | p < 0.001           | 1<2***, 1<3**, 4<2***          |
| Shannon                     | Fruit    | p < 0.001           | 1<4***, 2<4**                  |

91  
 92  
 93  
 94  
 95  
 96  
 97

**Table S7:** Relative abundances of CAZymes and functional groups (see separate dataset)

**SUPPLEMENTARY FIGURES**

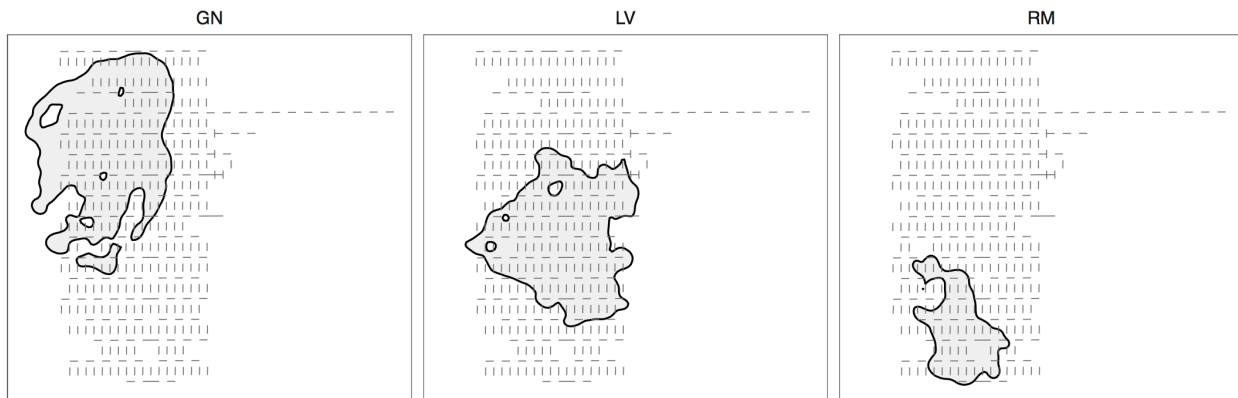

98  
 99  
 100  
 101  
 102  
 103  
 104

**Figure S1:** Home ranges of the three white-faced capuchin study groups (gray polygons), showing systematic placement of the 100-m long vegetation transects (small vertical and horizontal lines) used to calculate available fruit biomass.



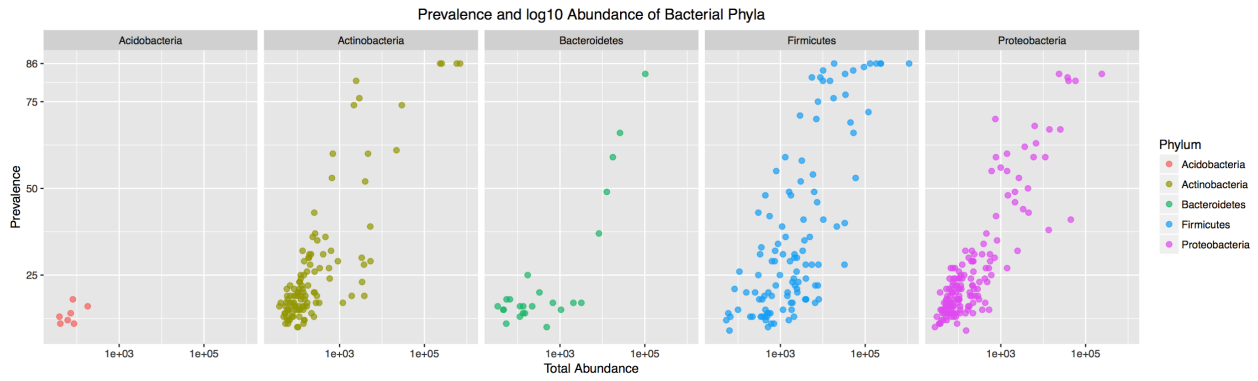

105  
106  
107  
108  
109  
110  
111  
112

**Figure S2:** Prevalence and log<sub>10</sub> abundance of bacterial phyla present at least once in 10% of samples. The gut of white-faced capuchins is dominated by Firmicutes, Proteobacteria, and Actinobacteria.

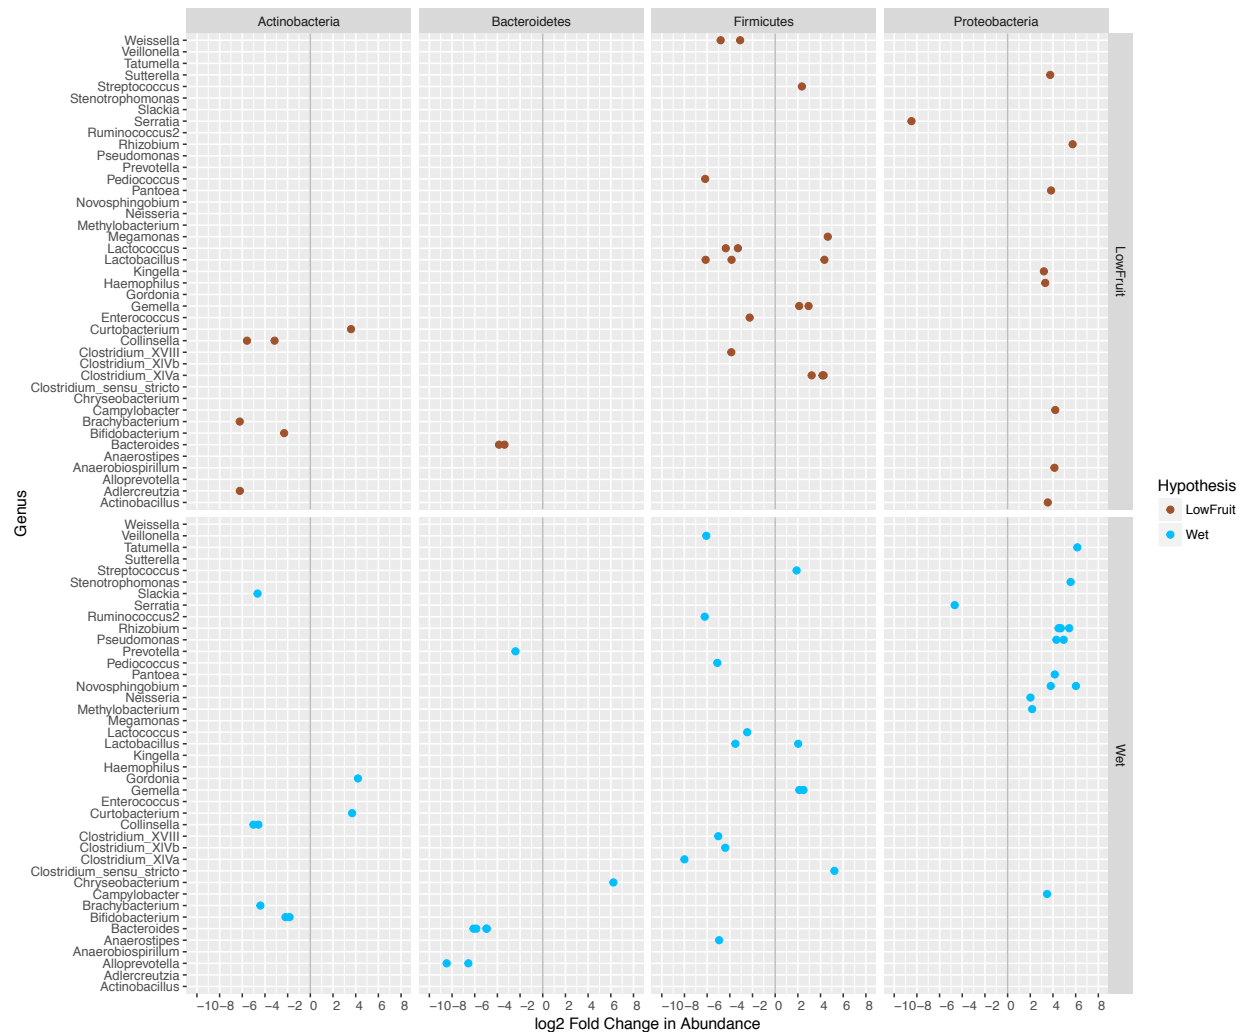

113  
114

115 **Figure S3:** ASVs with significantly different log2 fold abundance changes in wet and fruit  
 116 scarcity seasons by genera. Each point is a 16s V4 amplicon sequence variant with a significant  
 117 (adjusted  $p < 0.001$ ) difference in abundance during A) fruit scarcity (SB 2,3,4) season and B)  
 118 the wet (SB 2 and 3) season.

119  
 120  
 121

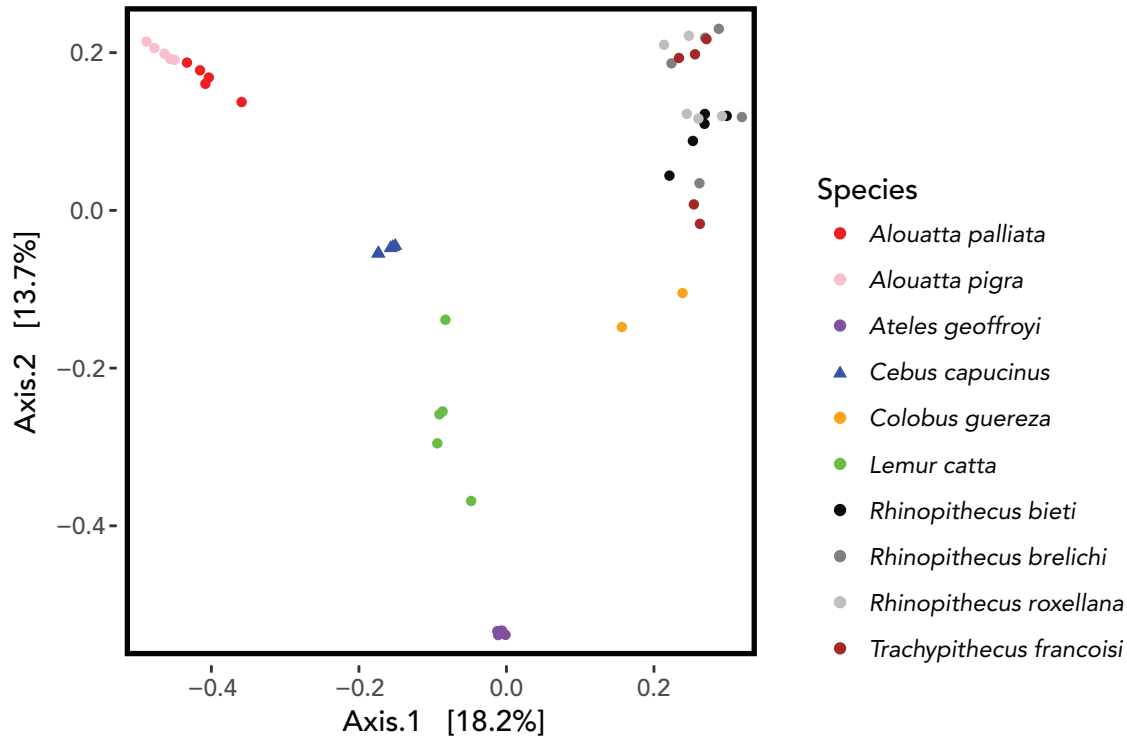

122  
 123  
 124  
 125  
 126  
 127  
 128

**Figure S4:** PCA of *Cebus capucinus* and other primate gut microbiomes. We processed all reads identically with DADA2 and ordinated them with PCA in phyloseq using Bray-Curtis distances and relative abundances. All five capuchin samples cluster tightly together to the exclusion of other primates. Data collected from [55, 56, 57].

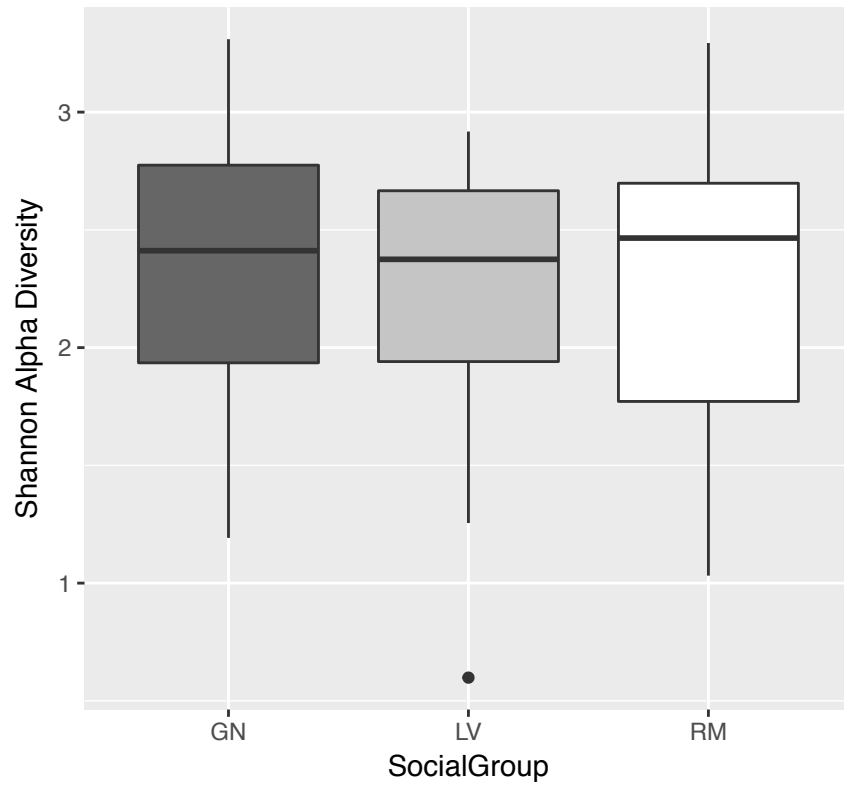

129  
130  
131  
132

**Figure S5:** Shannon Alpha diversity does not vary by social group at SSR.
